# Supplementary material for: Network evaluation from the consistency of the graph structure with the measured data
Source: PubMed Central journal article supplement (PMC2566979; doi:10.1186/1752-0509-2-84), 2008-10-01

## Additional file 6 – The 29 network structures analyzed in the present study

| page | ID           | description                                                 |
|------|--------------|-------------------------------------------------------------|
| 2    | C9333        | detoxification                                              |
| 3    | C9448        | amino acids                                                 |
| 4    | C9449        | carbon compounds                                            |
| 5    | C9426        | colanic acid (M antigen)                                    |
| 6    | C9509        | operon                                                      |
| 7    | C9448, C9462 | amino acids, formyl-THF biosynthesis                        |
| 8    | C9449        | carbon compounds                                            |
| 9    | C9331        | motility, chemotaxis, energytaxis (aerotaxis, redoxaxis etc |
| 10   | C9340        | flagella                                                    |
| 11   | C9362        | nucleoproteins, basic proteins                              |
| 12   | C9401        | tryptophan                                                  |
| 13   | C9449        | carbon compounds                                            |
| 14   | C9376        | cytoplasm                                                   |
| 15   | C9449        | carbon compounds                                            |
| 16   | C9449        | carbon compounds                                            |
| 17   | C9337        | SOS response                                                |
| 18   | C9354        | DNA repair                                                  |
| 19   | C9383        | arginine                                                    |
| 20   | C9474        | nucleotide and nucleoside conversions                       |
| 21   | C9493        | fermentation                                                |
| 22   | C9376        | cytoplasm                                                   |
| 23   | C9393        | isoleucine/valine                                           |
| 24   | C9420        | purine biosynthesis                                         |
| 25   | C9394        | leucine                                                     |
| 26   | C9504        | phosphorous metabolism                                      |
| 27   | C9528        | repressor                                                   |
| 28   | C9523        | activator                                                   |
| 29   | C9490        | anaerobic respiration                                       |
| 30   | C9372        | Transcription related                                       |

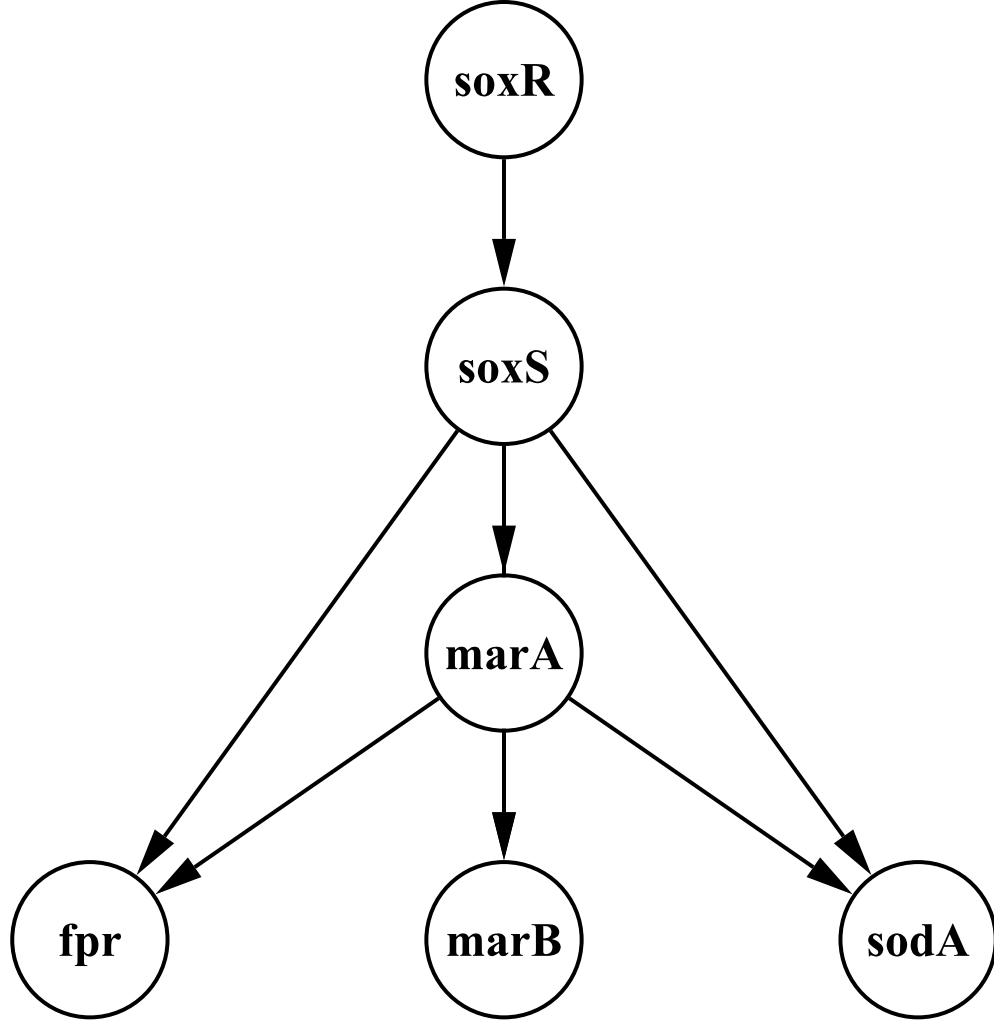

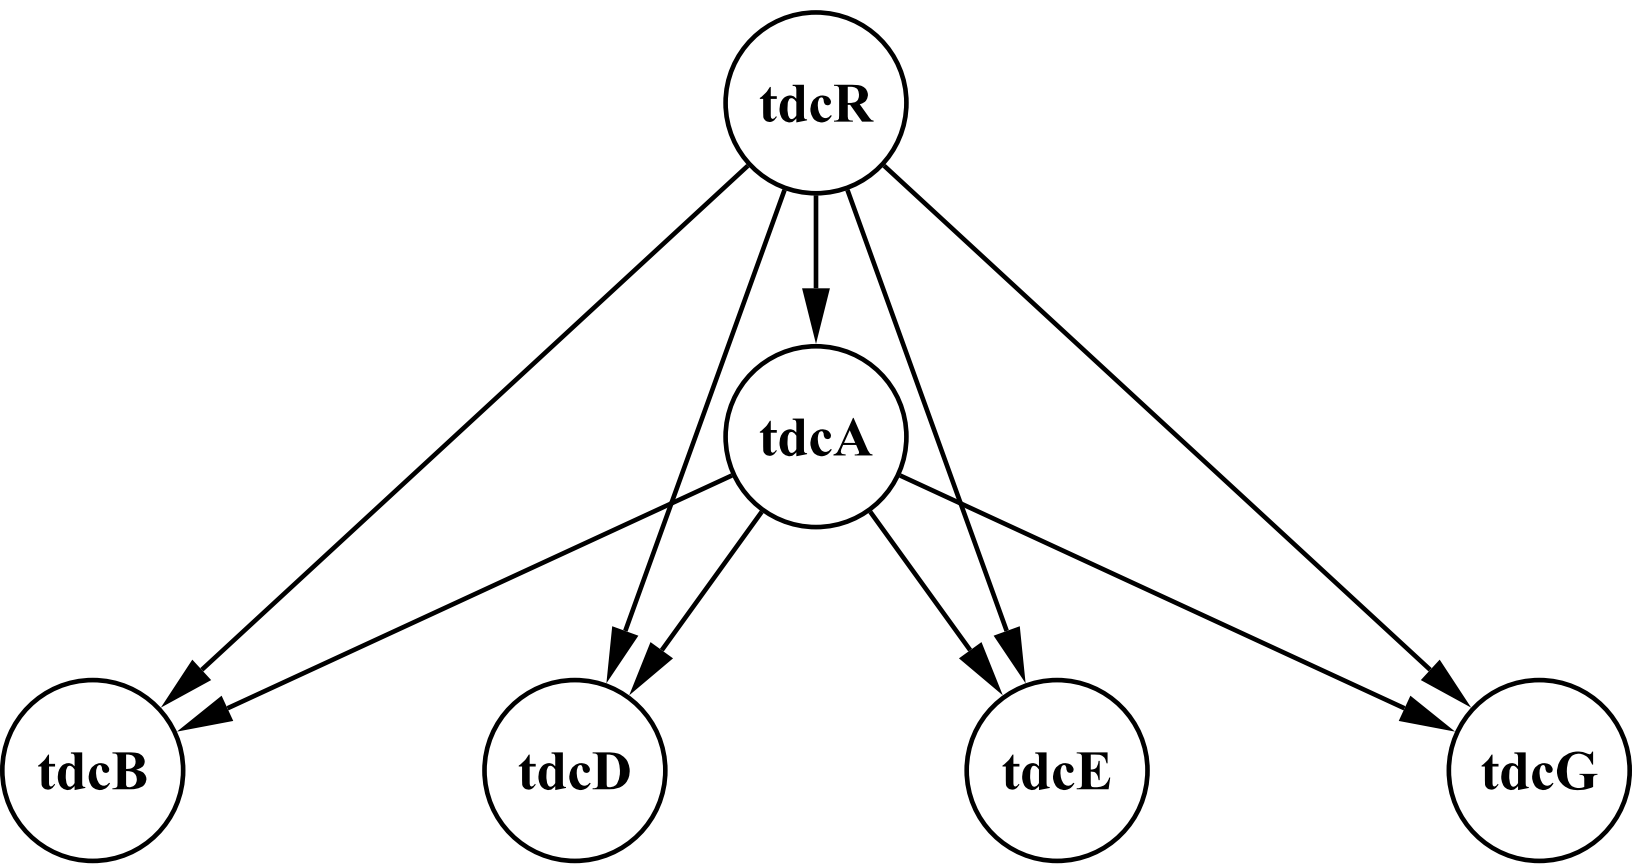

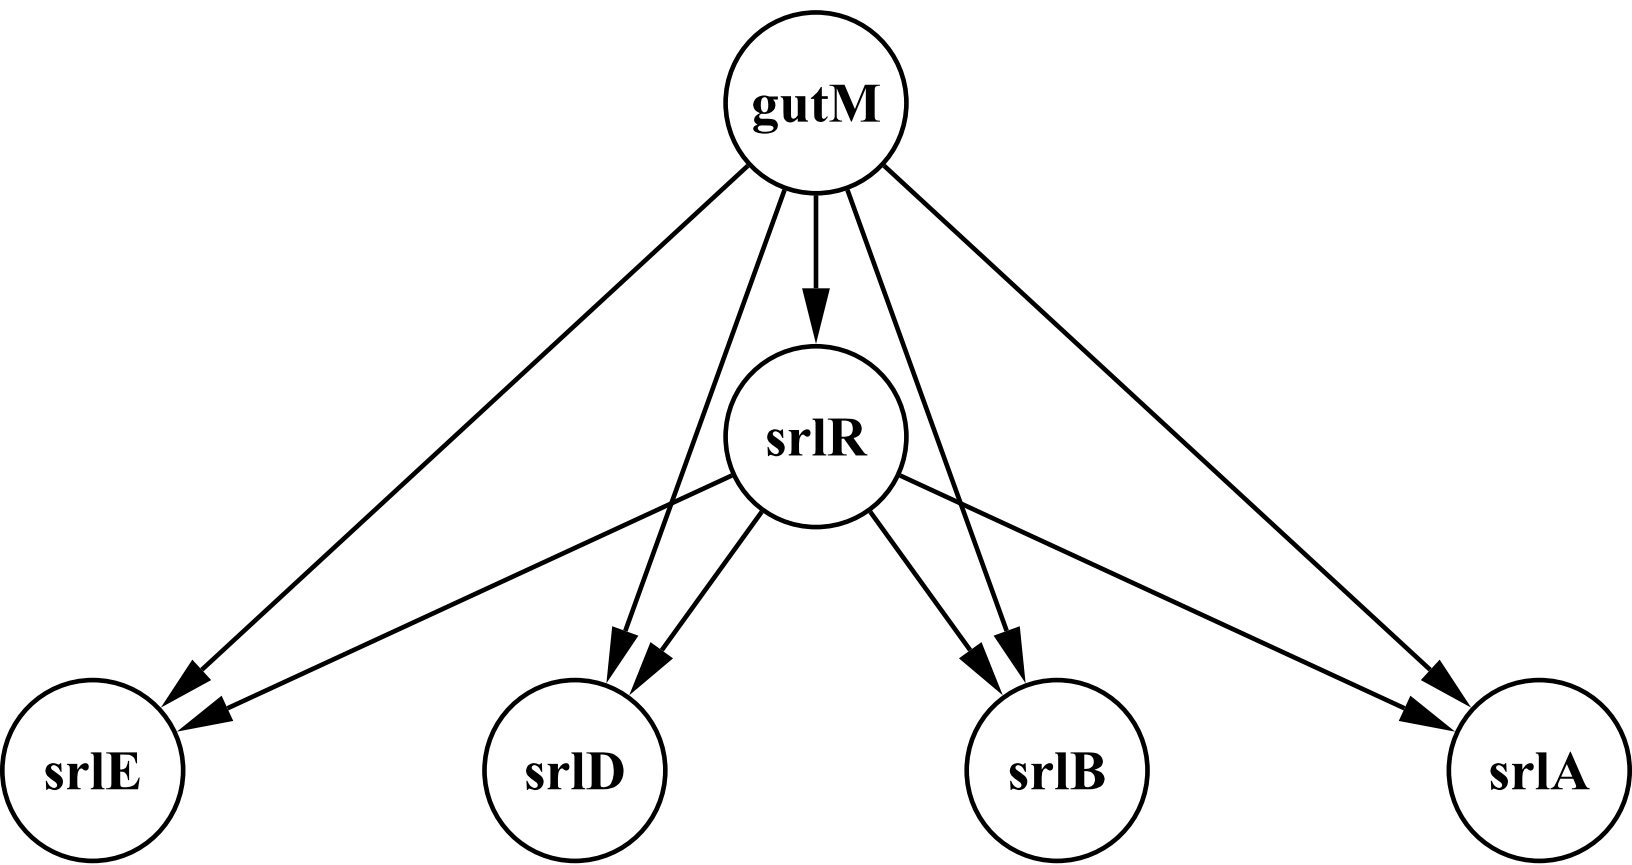

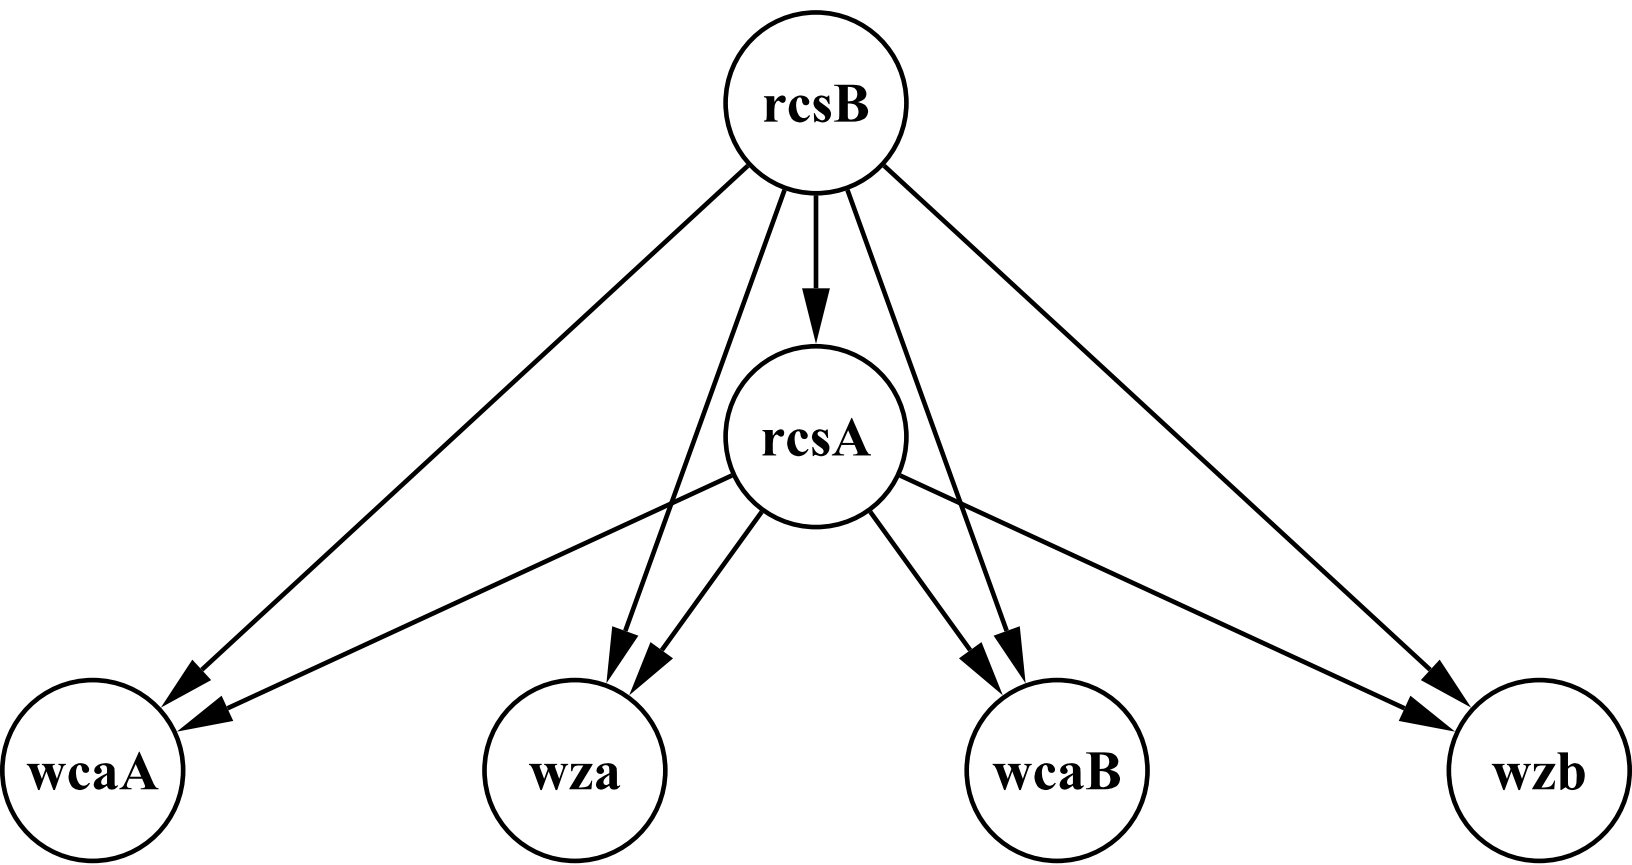

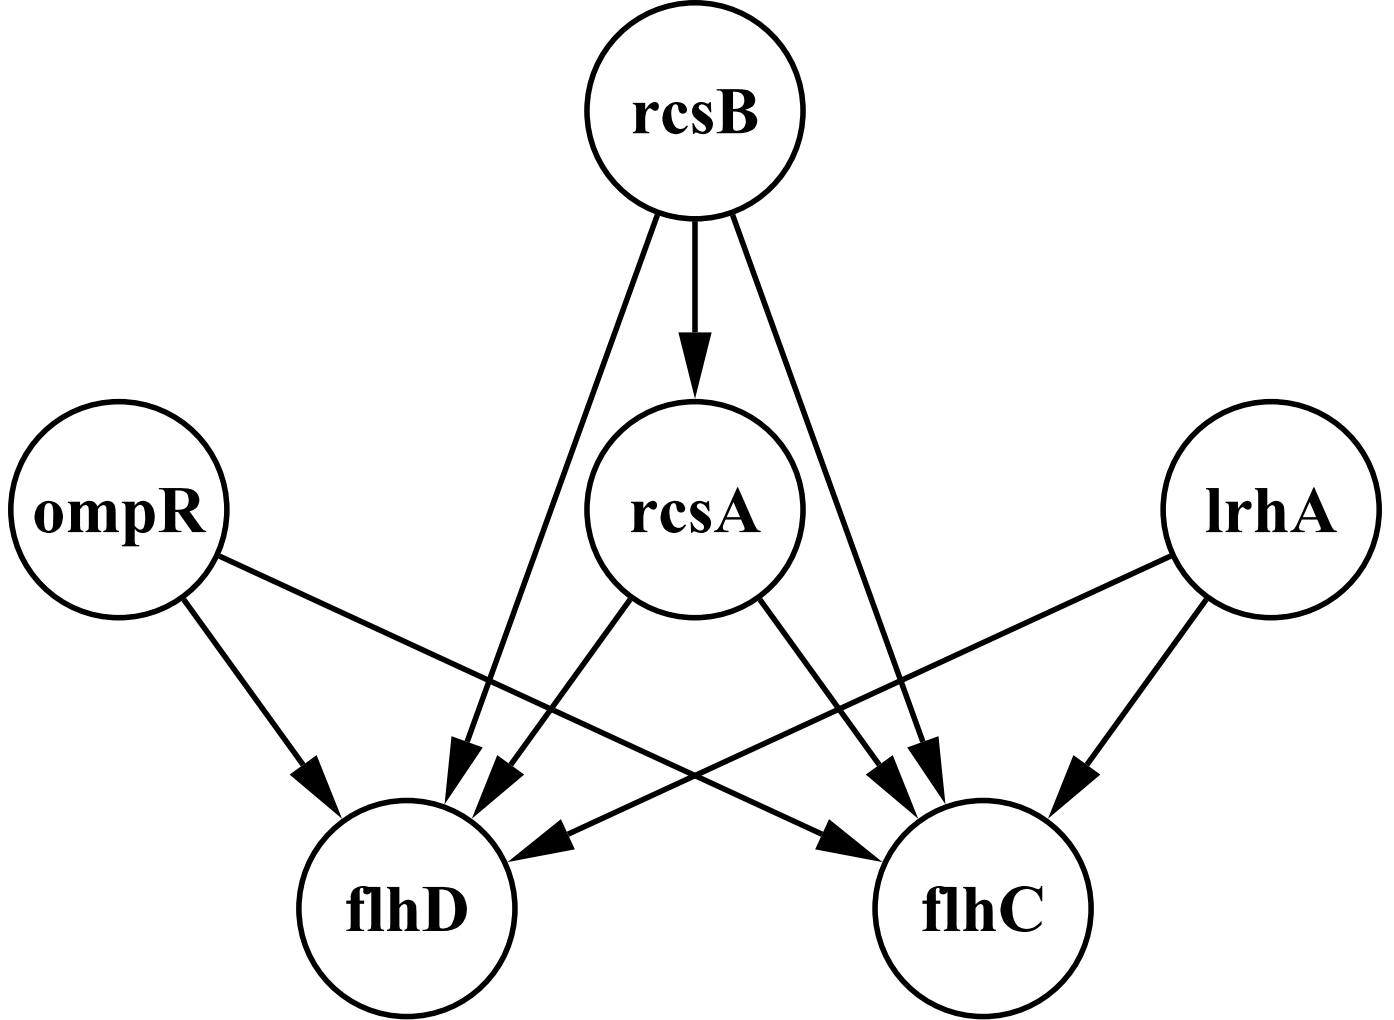

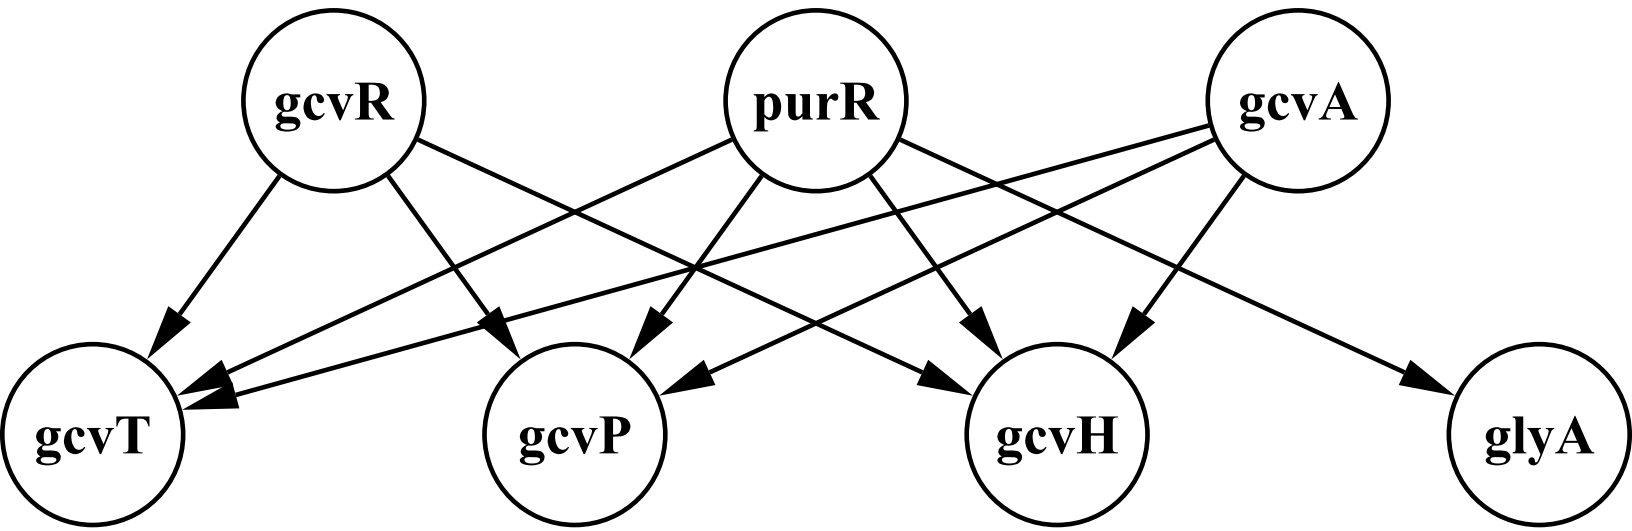

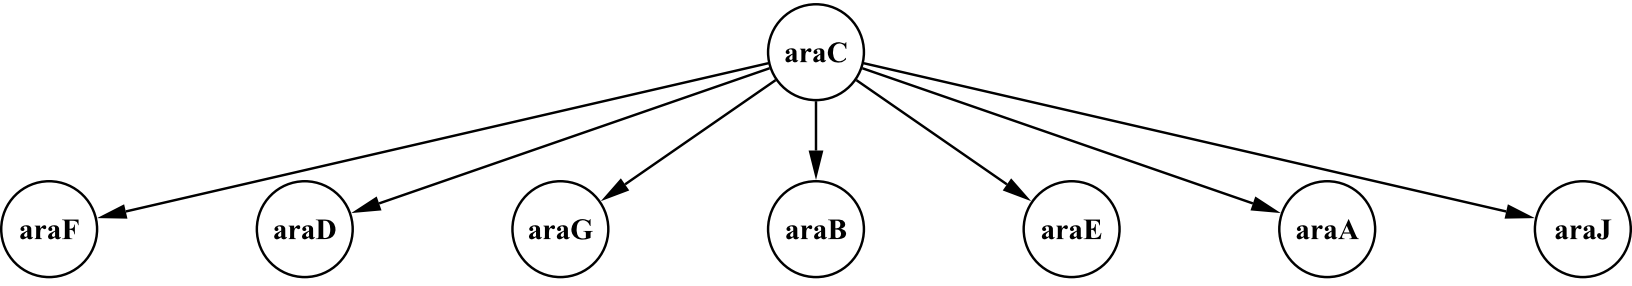



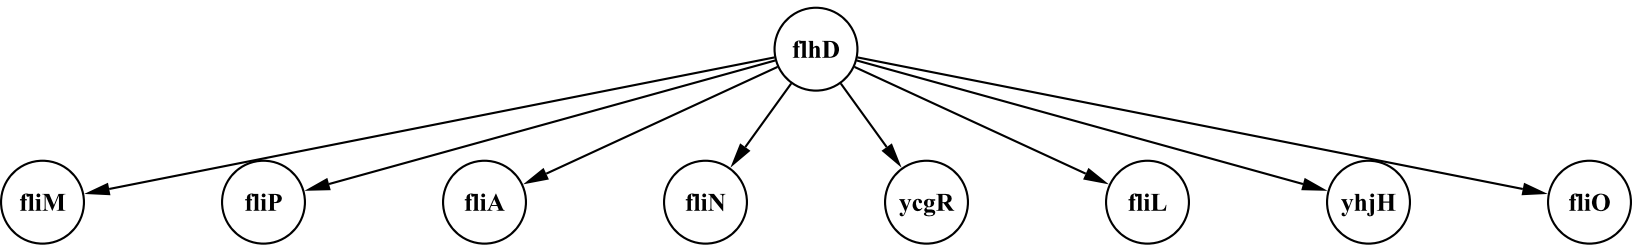

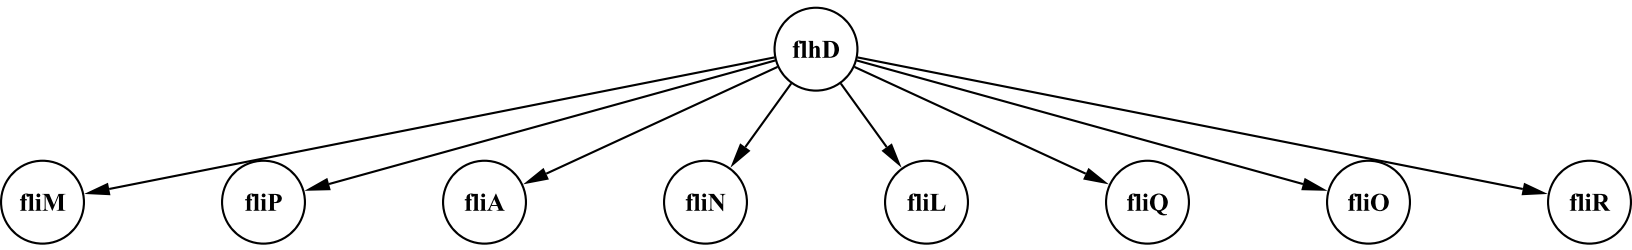

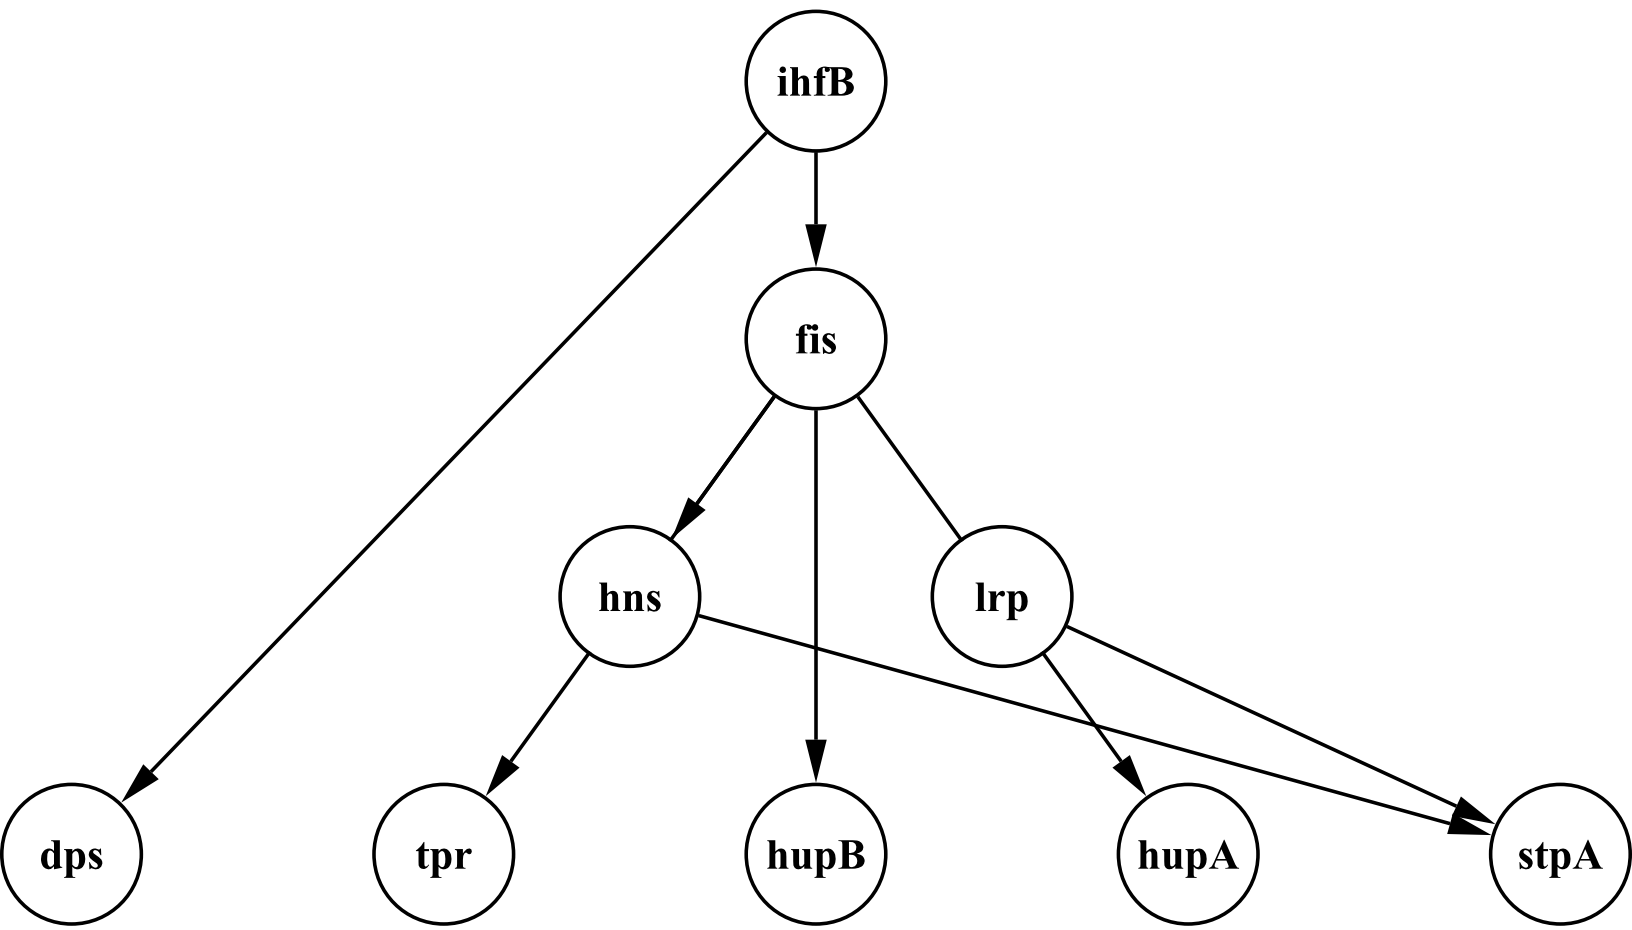

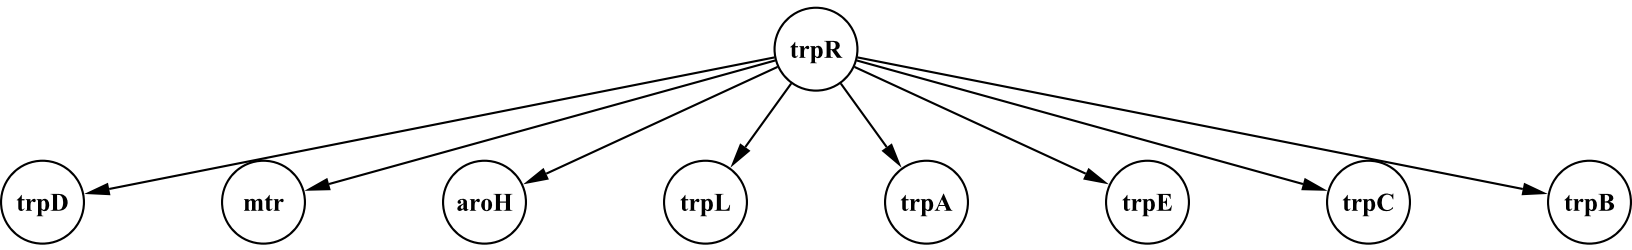

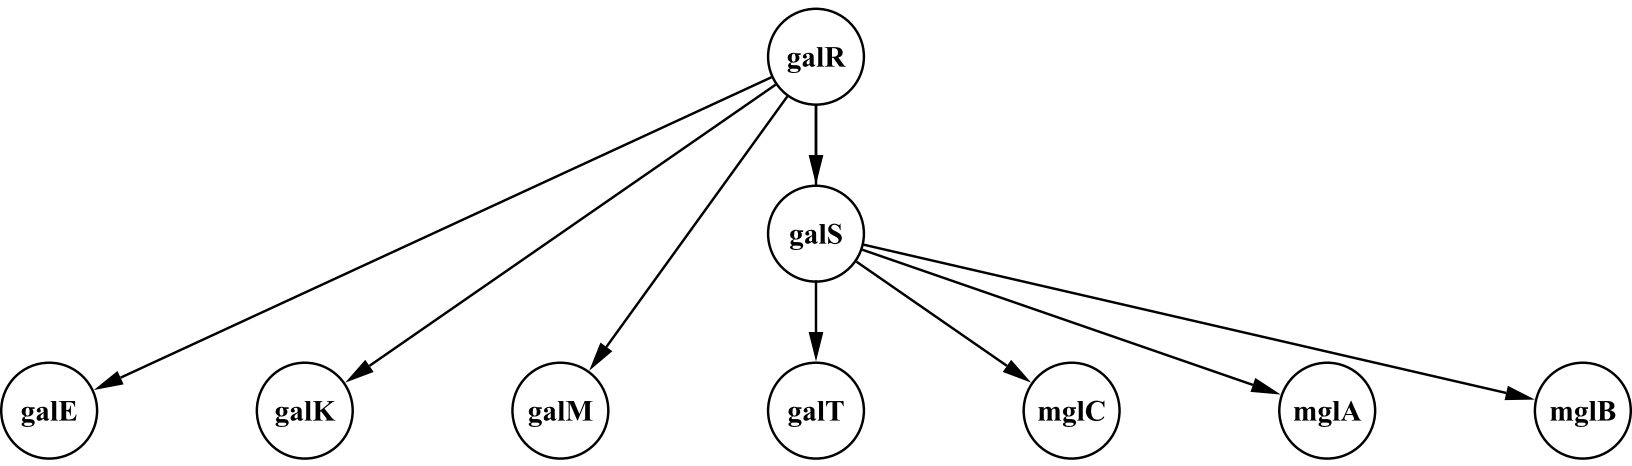

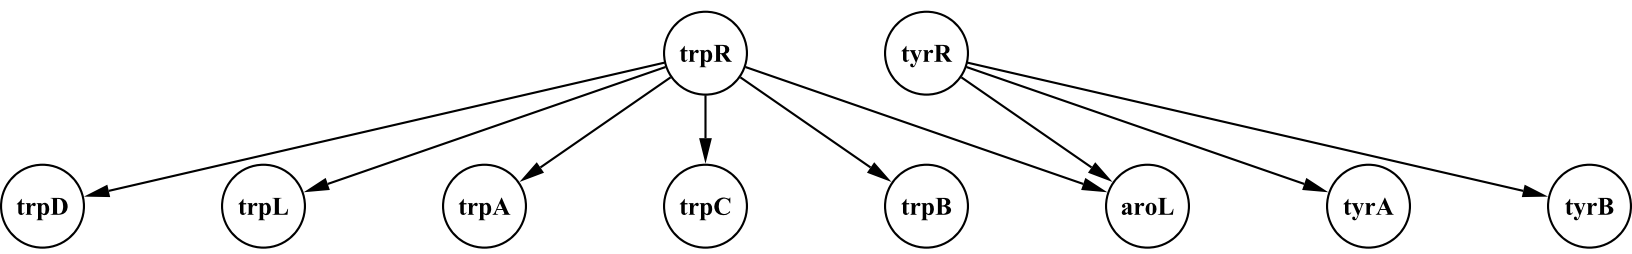

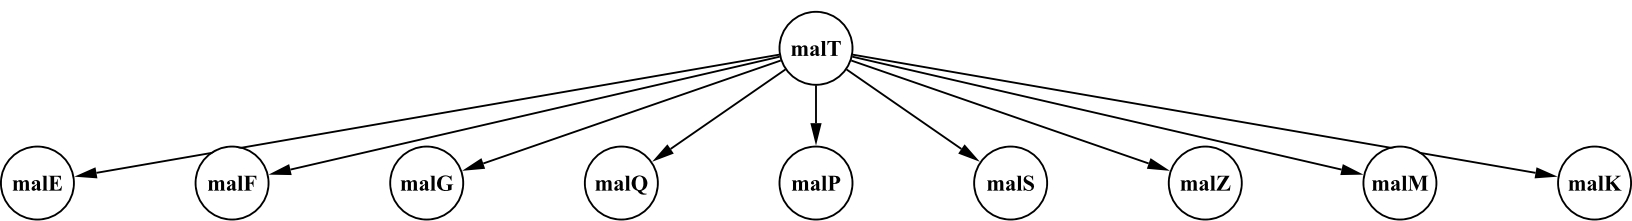

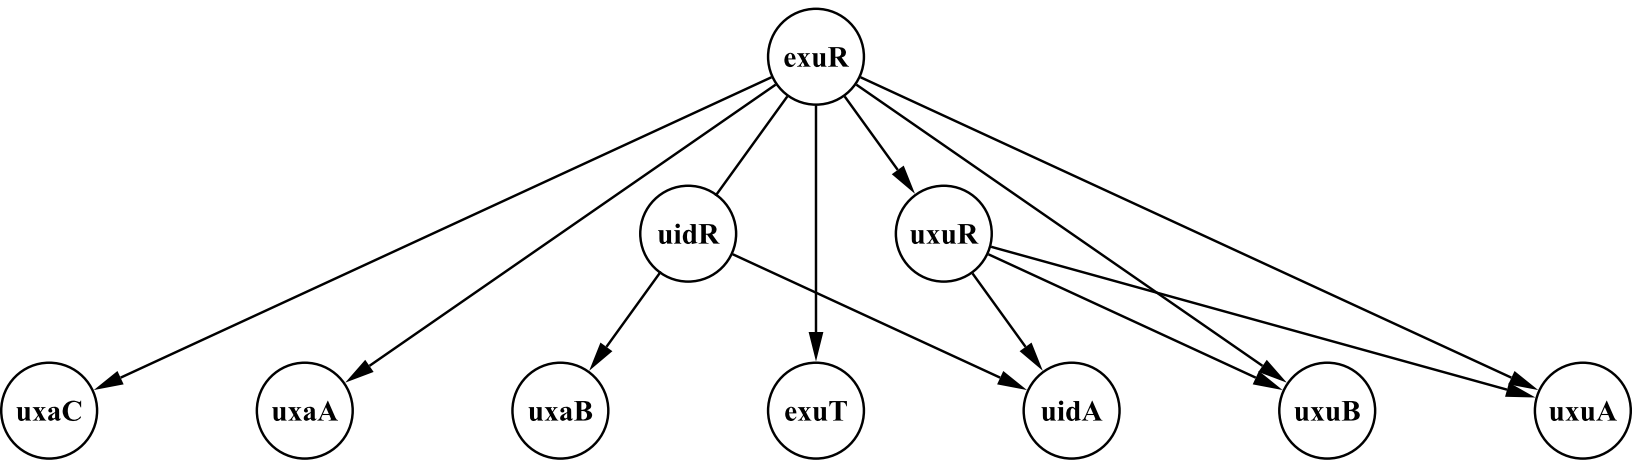



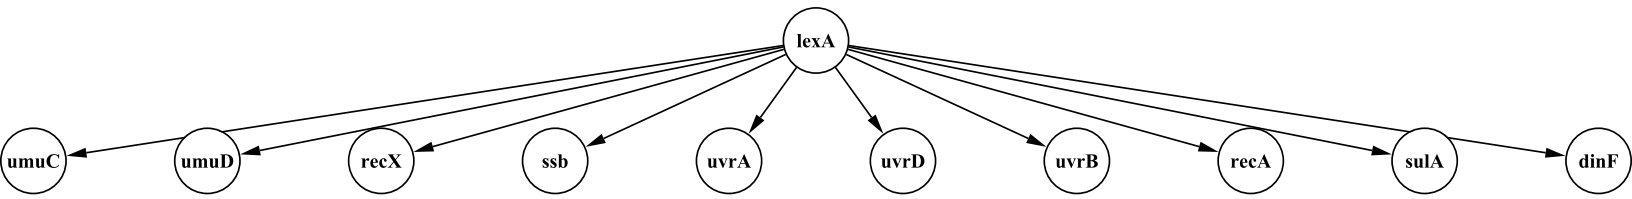

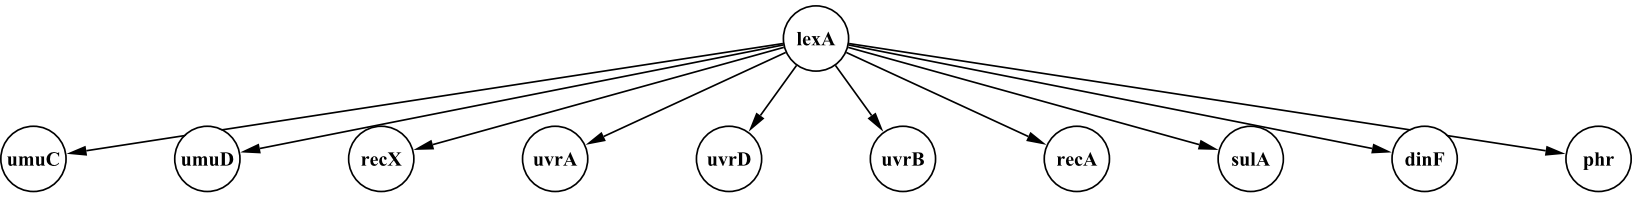

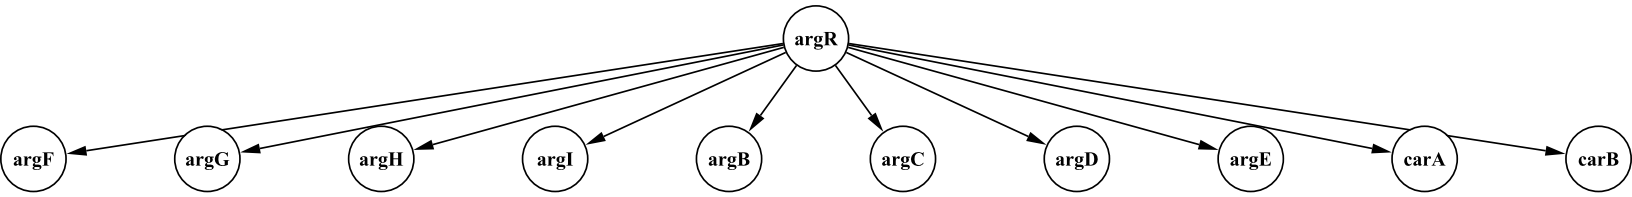

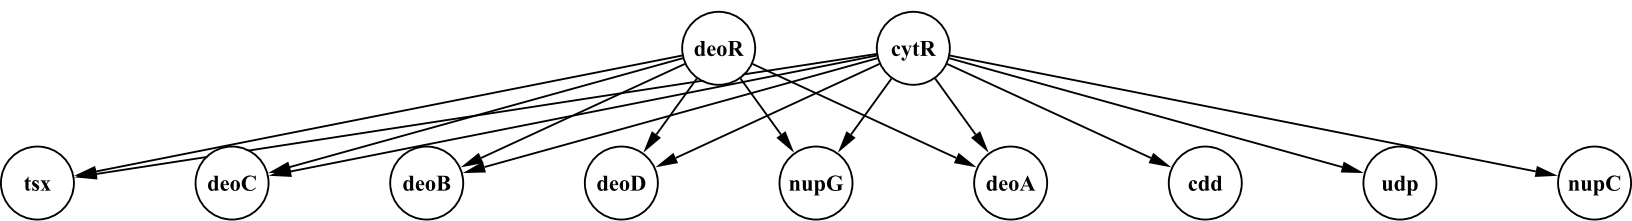

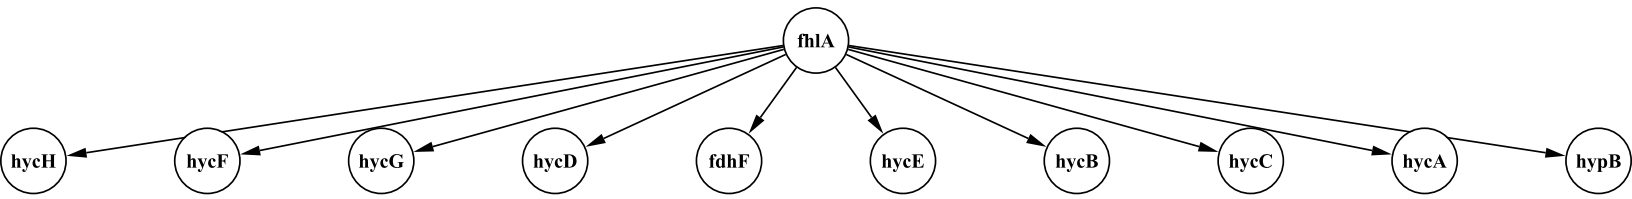

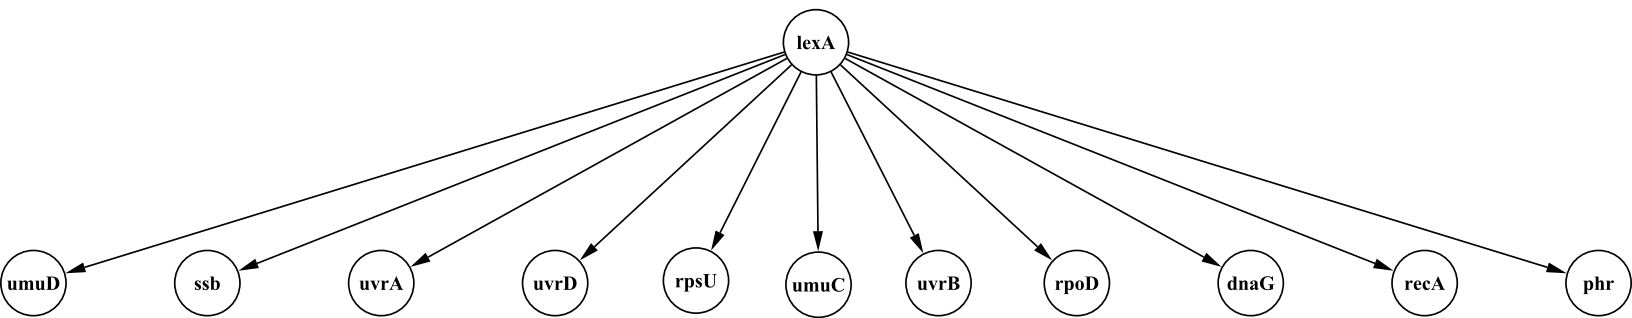

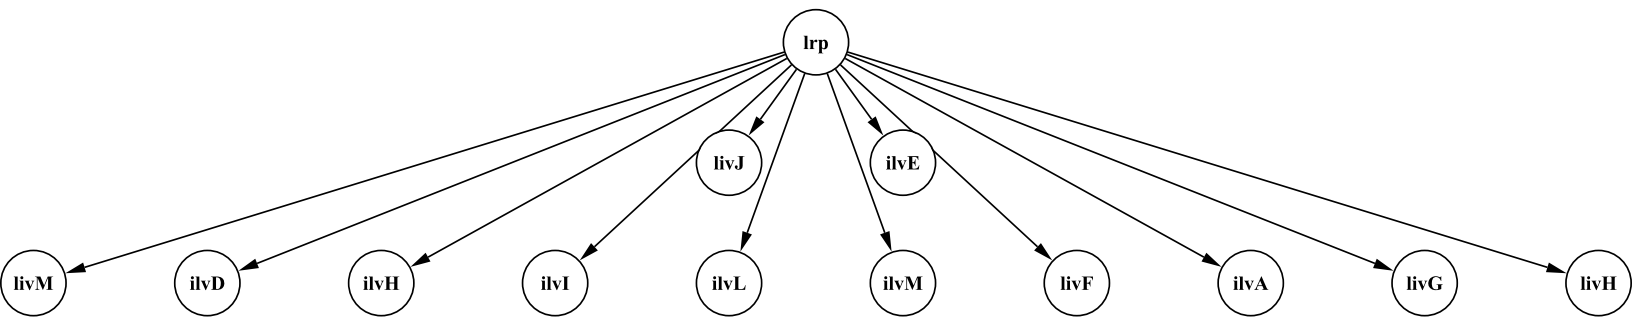

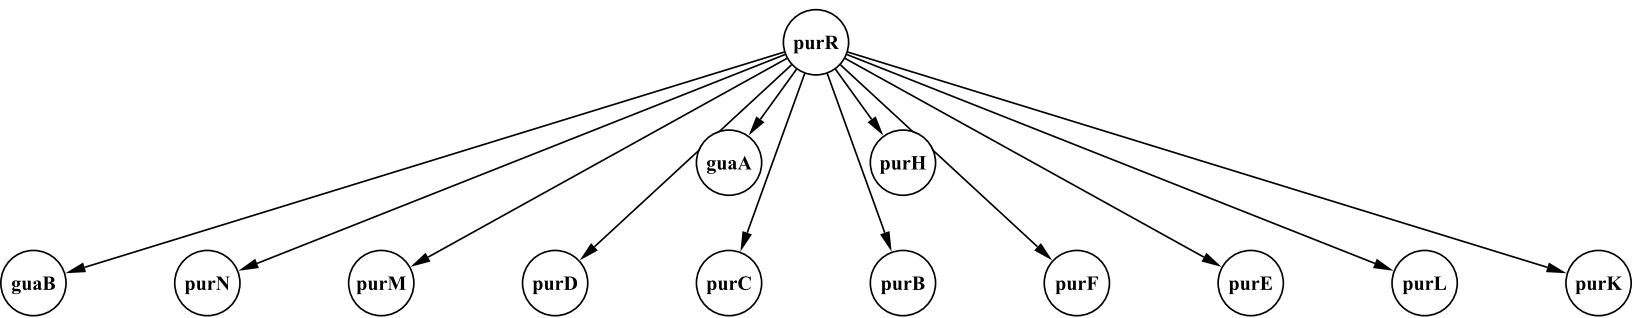



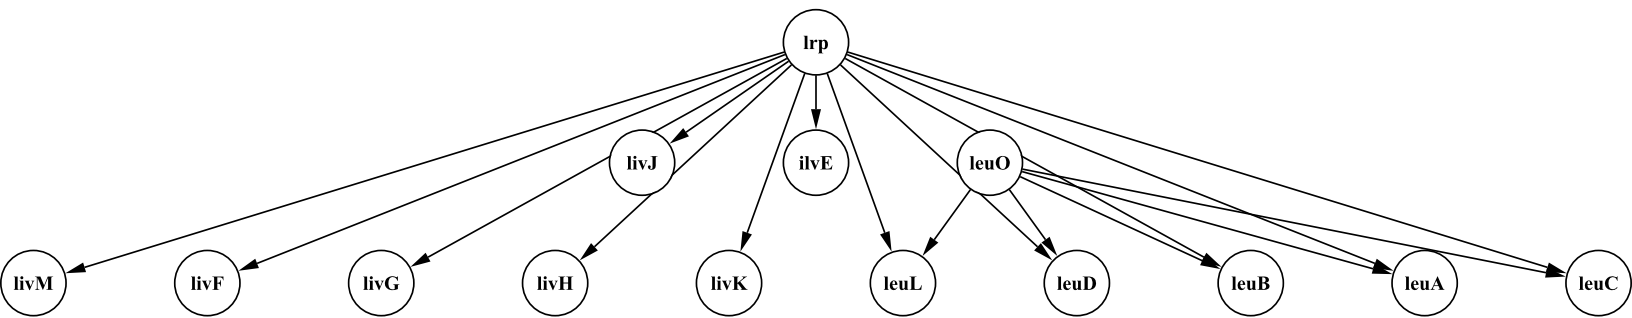

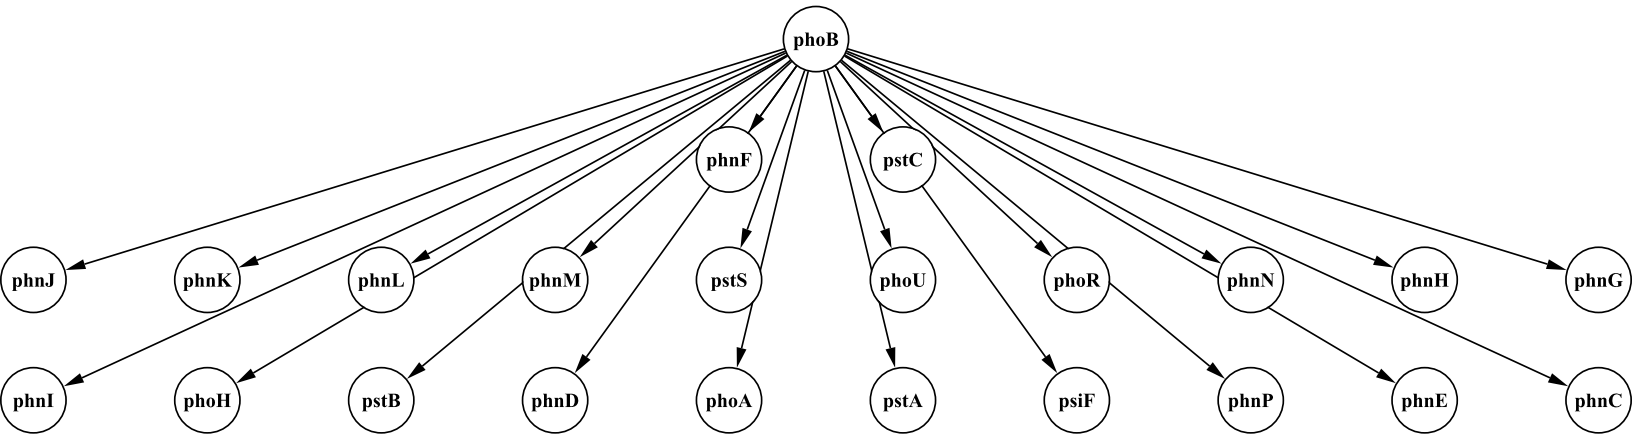

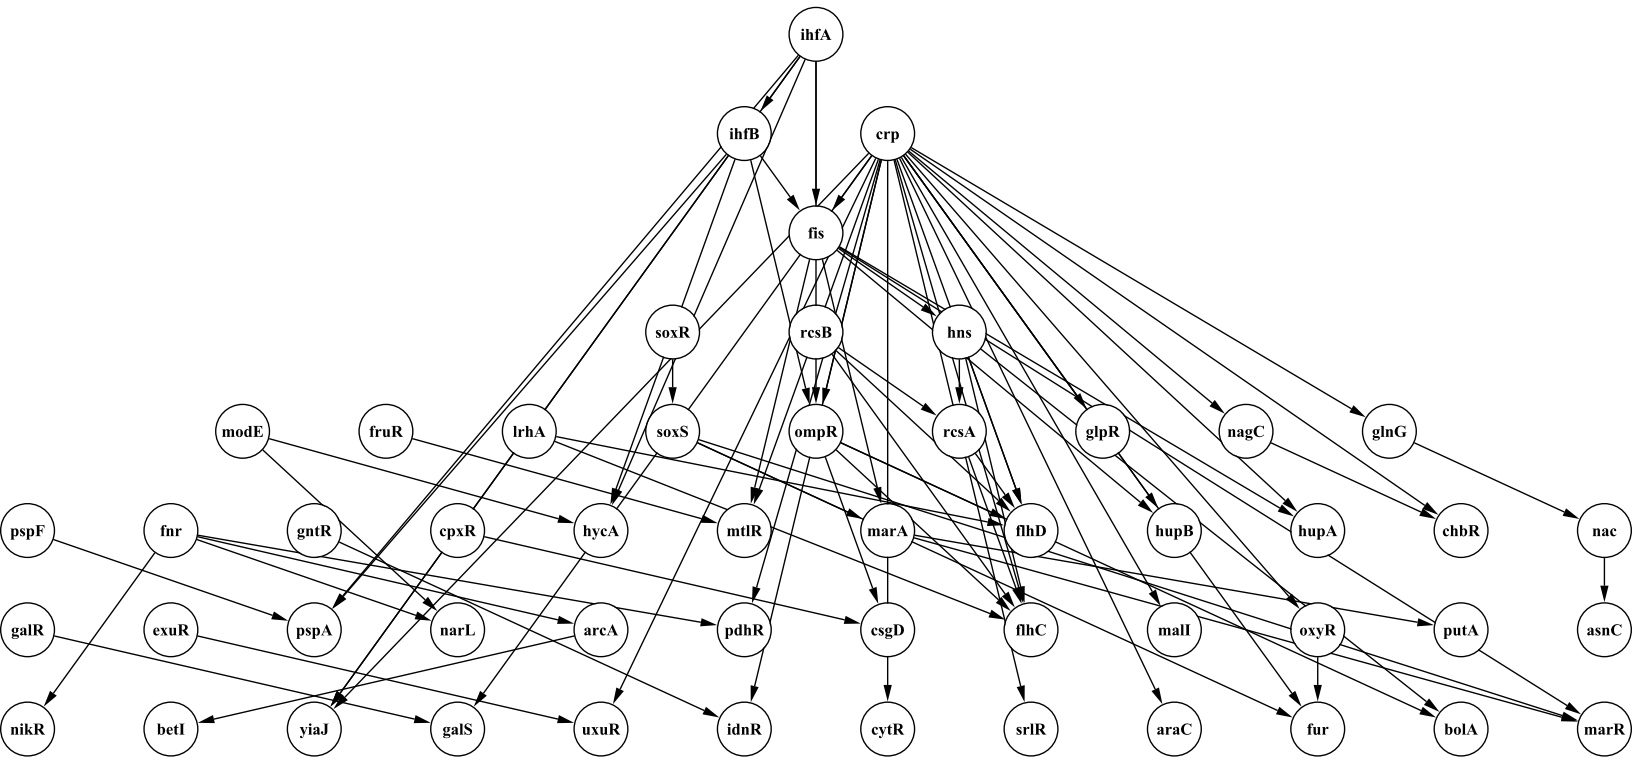

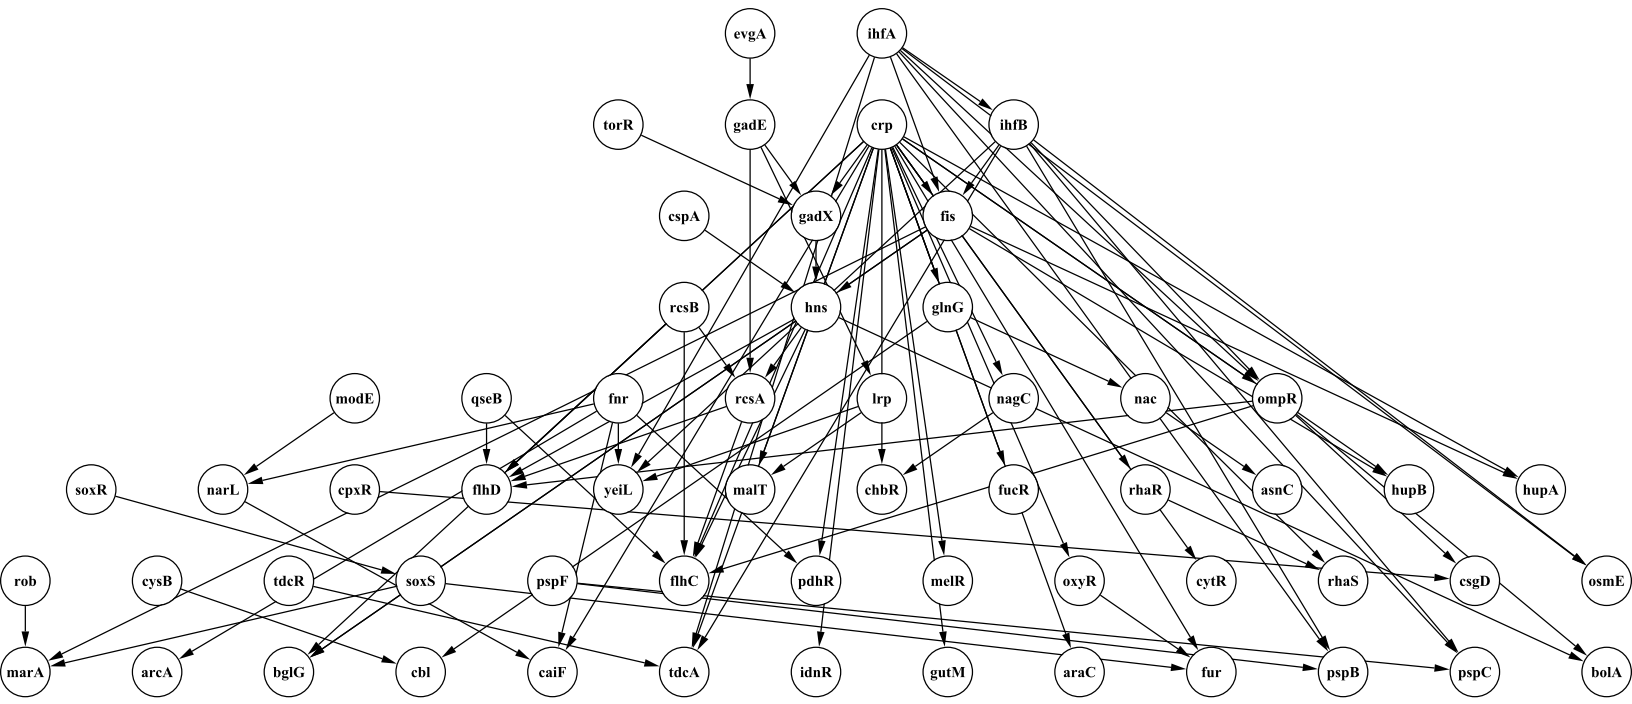

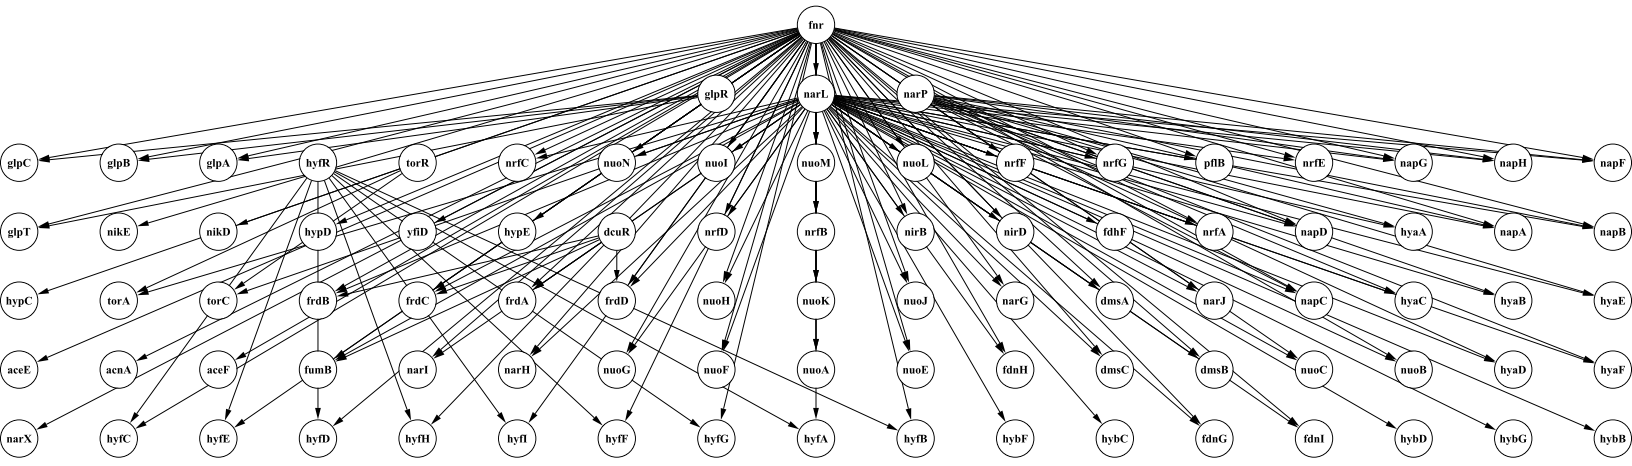

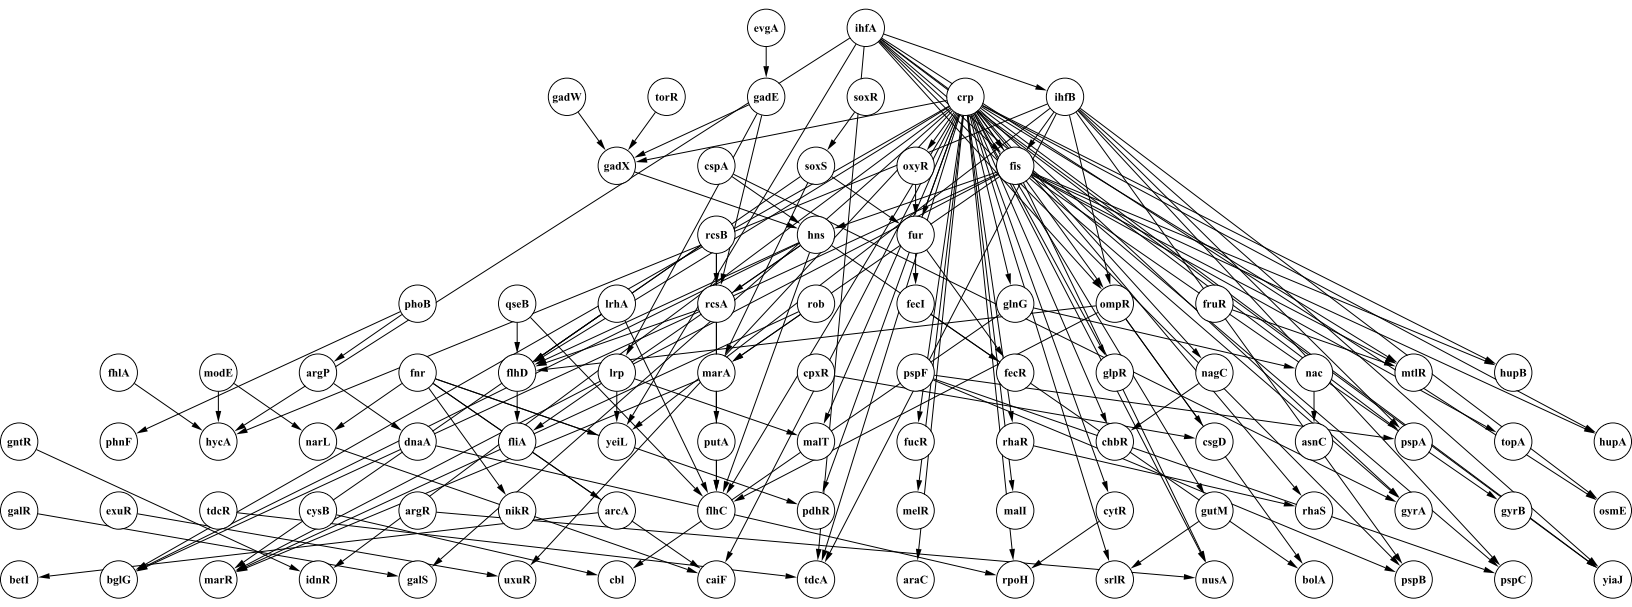

Supplement: 1752-0509-2-84-S6.pdf [file 1752-0509-2-84-S6.pdf]
