# Supplementary material for: Network evaluation from the consistency of the graph structure with the measured data
Source: PubMed Central journal article supplement (PMC2566979; doi:10.1186/1752-0509-2-84), 2008-10-01

# Additional file 2 – Robustness in terms of data dimensions

## (15 dimension)

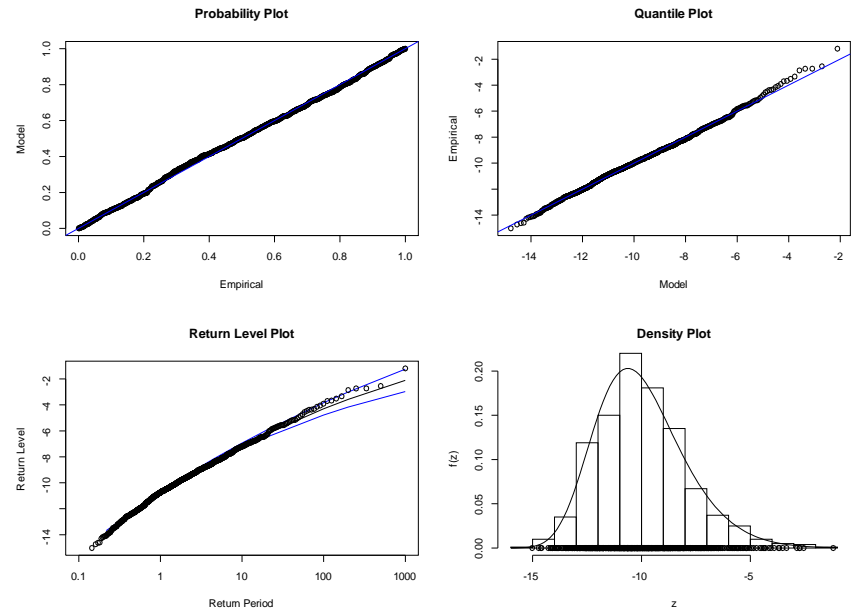

## (30 dimension)

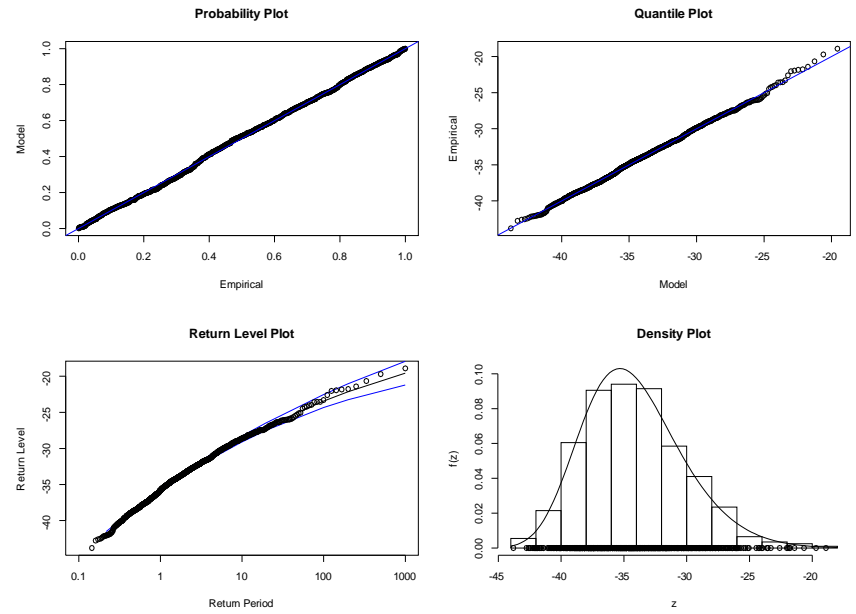

Supplement: 1752-0509-2-84-S2.pdf [file 1752-0509-2-84-S2.pdf]
