# Supplementary material for: Network evaluation from the consistency of the graph structure with the measured data
Source: PubMed Central journal article supplement (PMC2566979; doi:10.1186/1752-0509-2-84), 2008-10-01

# Additional file 4 – Robustness in terms of the noise according to the gamma and uniform distributions

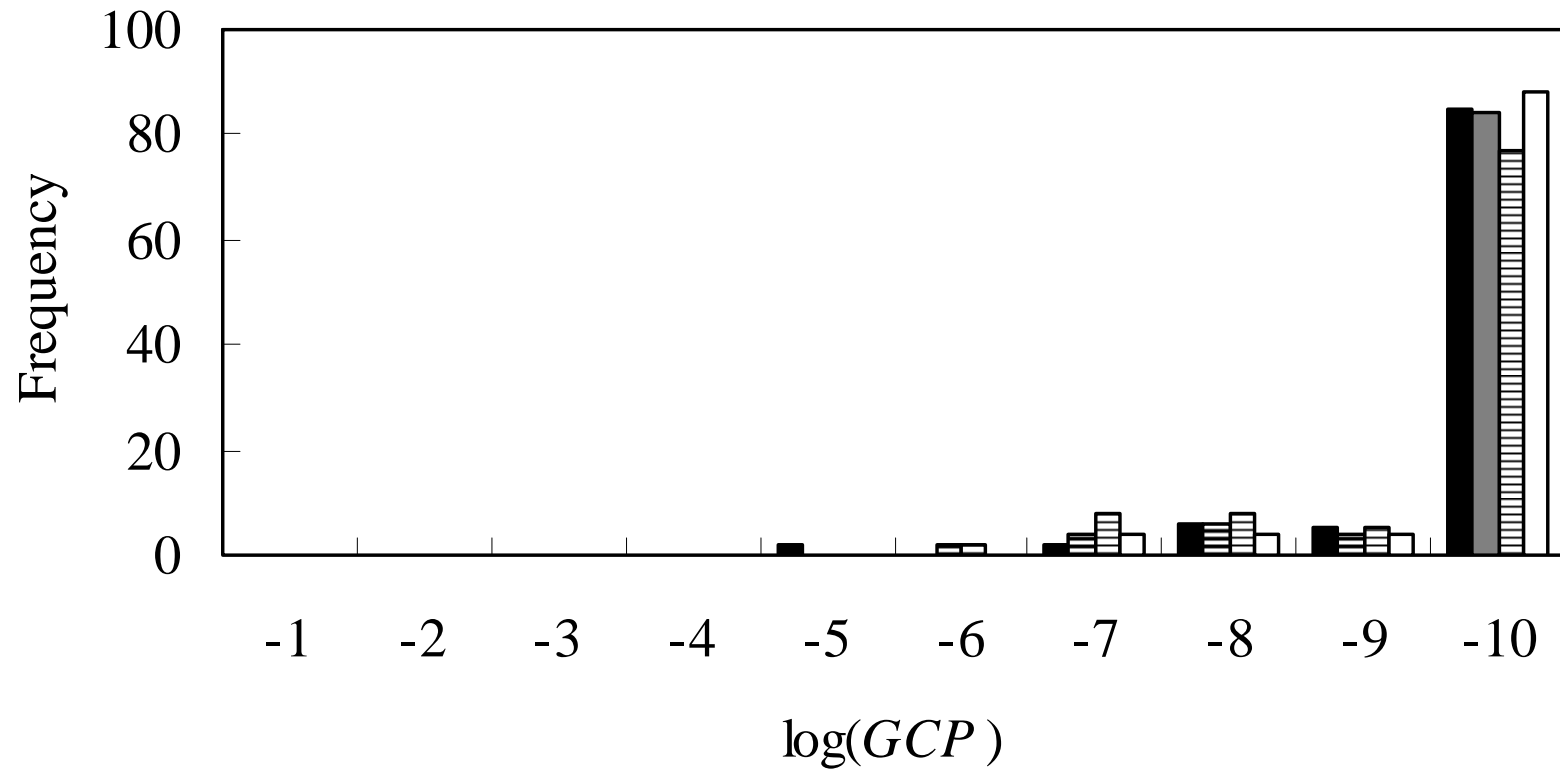

Supplement: 1752-0509-2-84-S4.pdf [file 1752-0509-2-84-S4.pdf]
