# Supplementary material for: Network evaluation from the consistency of the graph structure with the measured data
Source: PubMed Central journal article supplement (PMC2566979; doi:10.1186/1752-0509-2-84), 2008-10-01
Supplement: 1752-0509-2-84-S7.pdf [file 1752-0509-2-84-S7.pdf]

**Additional file 7 – SEM and d-sep test for 29 network structures**

| No. | ID           | Description                           | <i>GCP</i>   |              |
|-----|--------------|---------------------------------------|--------------|--------------|
|     |              |                                       | SEM          | d-sep test   |
| 1   | C9333        | detoxification                        | 0.193        | 0.230        |
| 2   | C9448        | amino acids                           | <b>0.005</b> | 0.106        |
| 3   | C9449        | carbon compounds                      | <b>0.001</b> | <b>0.000</b> |
| 4   | C9426        | colanic acid (M antigen)              | <b>0.007</b> | <b>0.013</b> |
| 5   | C9509        | operon                                | <b>0.000</b> | <b>0.001</b> |
| 6   | C9448, C9462 | amino acids, formyl-THF biosynthesis  | <b>0.000</b> | <b>0.024</b> |
| 7   | C9449        | carbon compounds                      | <b>0.000</b> | <b>0.001</b> |
| 8   | C9331        | motility, chemotaxis, energytaxis     | <b>0.001</b> | <b>0.000</b> |
| 9   | C9340        | flagella                              | <b>0.014</b> | <b>0.000</b> |
| 10  | C9362        | nucleoproteins, basic proteins        | <b>0.000</b> | <b>0.000</b> |
| 11  | C9401        | tryptophan                            | <b>0.000</b> | <b>0.000</b> |
| 12  | C9449        | carbon compounds                      | <b>0.000</b> | <b>0.000</b> |
| 13  | C9376        | cytoplasm                             | <b>0.000</b> | <b>0.000</b> |
| 14  | C9449        | <b>carbon compounds</b>               | <b>0.000</b> | <b>0.000</b> |
| 15  | C9449        | carbon compounds                      | <b>0.002</b> | <b>0.000</b> |
| 16  | C9337        | SOS response                          | <b>0.000</b> | <b>0.000</b> |
| 17  | C9354        | DNA repair                            | <b>0.000</b> | <b>0.000</b> |
| 18  | C9383        | arginine                              | <b>0.000</b> | <b>0.000</b> |
| 19  | C9474        | nucleotide and nucleoside conversions | <b>0.000</b> | <b>0.000</b> |
| 20  | C9493        | fermentation                          | <b>0.000</b> | <b>0.000</b> |
| 21  | C9376        | cytoplasm                             | <b>0.000</b> | <b>0.000</b> |
| 22  | C9393        | isoleucine/valine                     | <b>0.000</b> | <b>0.000</b> |
| 23  | C9420        | purine biosynthesis                   | <b>0.000</b> | <b>0.000</b> |
| 24  | C9394        | leucine                               | <b>0.000</b> | <b>0.000</b> |
| 25  | C9504        | phosphorous metabolism                | NA           | <b>0.000</b> |
| 26  | C9528        | repressor                             | <b>0.000</b> | <b>0.000</b> |
| 27  | C9523        | activator                             | <b>0.000</b> | <b>0.000</b> |
| 28  | C9490        | <b>anaerobic respiration</b>          | <b>0.000</b> | <b>0.000</b> |
| 29  | C9372        | Transcription related                 | <b>0.000</b> | <b>0.000</b> |

# The value of '0.000' indicates that the probability was less than 0.0004, and 'NA' indicates that the probability could not be obtained due to the calculation violation.
